# Supplementary material for: Long-Term Community Dynamics Reveal Different Trajectories for Two Mid-Atlantic Maritime Forests
Source: MDPI journal article supplement (doi:10.3390/f12081063), 2021-08-10
Supplement: s1 [file s1]

Supplementary Table 1: Point quarter plot summary table of the canopy layer of maritime forest Savage Neck. Dominant species for each year are indicated in bold based on importance value each year.

| Species                        | Number |      | Relative Density |      | Basal Area (cm <sup>2</sup> ) |        | Relative Basal Area |      | Relative Frequency |      | Importance Value |           |
|--------------------------------|--------|------|------------------|------|-------------------------------|--------|---------------------|------|--------------------|------|------------------|-----------|
|                                | 2003   | 2018 | 2003             | 2018 | 2003                          | 2018   | 2003                | 2018 | 2003               | 2018 | 2003             | 2018      |
| <i>Liquidambar styraciflua</i> | 319    | 176  | 29               | 18.5 | 146802                        | 109264 | 25                  | 16.7 | 24                 | 25   | <b>78</b>        | <b>60</b> |
| <i>Acer rubrum</i>             | 254    | 272  | 23               | 28.7 | 158897                        | 234295 | 27                  | 35.8 | 20                 | 23   | <b>70</b>        | <b>87</b> |
| <i>Pinus taeda</i>             | 231    | 238  | 21               | 25.1 | 170699                        | 248911 | 29                  | 38.1 | 20                 | 21   | <b>70</b>        | <b>84</b> |
| <i>Ilex opaca</i>              | 94     | 162  | 9                | 17.1 | 9991                          | 28311  | 2                   | 4.3  | 11                 | 17   | 21               | 38        |
| <i>Prunus serotina</i>         | 69     | 6    | 6                | 0.6  | 20964                         | 770    | 4                   | 0.1  | 8                  | 1    | 18               | 2         |
| <i>Liriodendron tulipifera</i> | 33     | 9    | 3                | 0.9  | 60842                         | 6126   | 10                  | 0.9  | 3                  | 2    | 16               | 4         |
| <i>Nyssa sylvatica</i>         | 51     | 70   | 5                | 7.4  | 14250                         | 21483  | 2                   | 3.3  | 7                  | 9    | 14               | 19        |
| <i>Quercus rubra</i>           | 16     | 3    | 1                | 0.3  | 4344                          | 2573   | 1                   | 0.4  | 2                  | 0.4  | 4                | 1         |
| <i>Cornus florida</i>          | 12     | 0    | 1                | 0    | 914                           | 0      | 0.2                 | 0    | 2                  | 0    | 3                | 0         |
| <i>Morus rubra</i>             | 7      | 1    | 1                | 0.1  | 919                           | 138    | 0.2                 | 0    | 1                  | 2    | 2                | 2         |
| <i>Sassafras albidum</i>       | 9      | 2    | 1                | 0.2  | 1048                          | 341    | 0.2                 | 0.1  | 1                  | 0.3  | 2                | 1         |
| <i>Quercus nigra</i>           | 4      | 1    | 0                | 0.1  | 1554                          | 187    | 0.3                 | 0    | 1                  | 0    | 1                | 0.1       |
| <i>Cercis canadensis</i>       | 2      | 0    | 0                | 0    | 151                           | 0      | 0                   | 0    | 0.3                | 0    | 0.5              | 0         |
| <i>Juniperus virginiana</i>    | 2      | 3    | 0                | 0.3  | 136                           | 312    | 0                   | 0    | 0.3                | 0    | 0.5              | 0.4       |
| <i>Carya tomentosa</i>         | 1      | 0    | 0                | 0    | 526                           | 0      | 0.1                 | 0    | 0.1                | 0    | 0.3              | 0         |
| <i>Quercus stellata</i>        | 0      | 4    | 0                | 0.4  | 0                             | 654    | 0                   | 0.1  | 0                  | 0.4  | 0                | 1         |
| <i>Celtis occidentalis</i>     | 0      | 1    | 0                | 0.1  | 0                             | 150    | 0                   | 0    | 0                  | 0    | 0                | 0.1       |
| <i>Robinia pseudoacacia</i>    | 0      | 1    | 0                | 0.1  | 0                             | 64     | 0                   | 0    | 0                  | 0    | 0                | 0.1       |
| Total                          | 1104   | 949  | 100              | 100  | 592035                        | 653579 | 100                 | 100  | 100                | 100  | 300              | 300       |

Supplementary Table 2: Fixed radial plot summary table of the canopy layer of maritime forest on Parramore Island, VA. Dominant species for each year are indicated in bold based on importance value each year.

| Tree-Species                      | Number |      | Relative Density |      | Basal Area (cm <sup>2</sup> ) |      | Relative Basal Area |      | Relative Frequency |      | Importance Value |            |
|-----------------------------------|--------|------|------------------|------|-------------------------------|------|---------------------|------|--------------------|------|------------------|------------|
|                                   | 1997   | 2018 | 1997             | 2018 | 1997                          | 2018 | 1997                | 2018 | 1997               | 2018 | 1997             | 2018       |
| <i>Persea palustris</i>           | 418    | 52   | 46               | 13   | 5873                          | 367  | 30                  | 12   | 20                 | 24   | <b>96</b>        | <b>49</b>  |
| <i>Juniperus virginiana</i>       | 166    | 2    | 18               | 0    | 6015                          | 44   | 32                  | 1    | 20                 | 7    | <b>70</b>        | 8          |
| <i>Morella cerifera</i>           | 181    | 283  | 20               | 69   | 3178                          | 1865 | 16                  | 59   | 22                 | 28   | <b>58</b>        | <b>156</b> |
| <i>Pinus taeda</i>                | 33     | 56   | 4                | 14   | 2012                          | 635  | 10                  | 20   | 17                 | 14   | 31               | <b>48</b>  |
| <i>Ilex opaca</i>                 | 41     | 1    | 5                | 0    | 916                           | 20   | 5                   | 1    | 10                 | 3    | 19               | 4          |
| <i>Baccharis halmifolia</i>       | 53     | 19   | 6                | 4    | 1028                          | 211  | 5                   | 7    | 2                  | 24   | 13               | 35         |
| <i>Prunus serotina</i>            | 7      | 0    | 1                | 0    | 277                           | 0    | 1                   | 0    | 5                  | 0    | 7                | 0          |
| <i>Celtis laevigata</i>           | 4      | 0    | 0                | 0    | 183                           | 0    | 1                   | 0    | 2                  | 0    | 3                | 0          |
| <i>Zanthoxylum clava-herculis</i> | 1      | 0    | 0                | 0    | 45                            | 0    | 0                   | 0    | 2                  | 0    | 3                | 0          |
| Total                             | 904    | 413  | 100              | 100  | 19527                         | 3142 | 100                 | 100  | 100                | 100  | 300              | 300        |

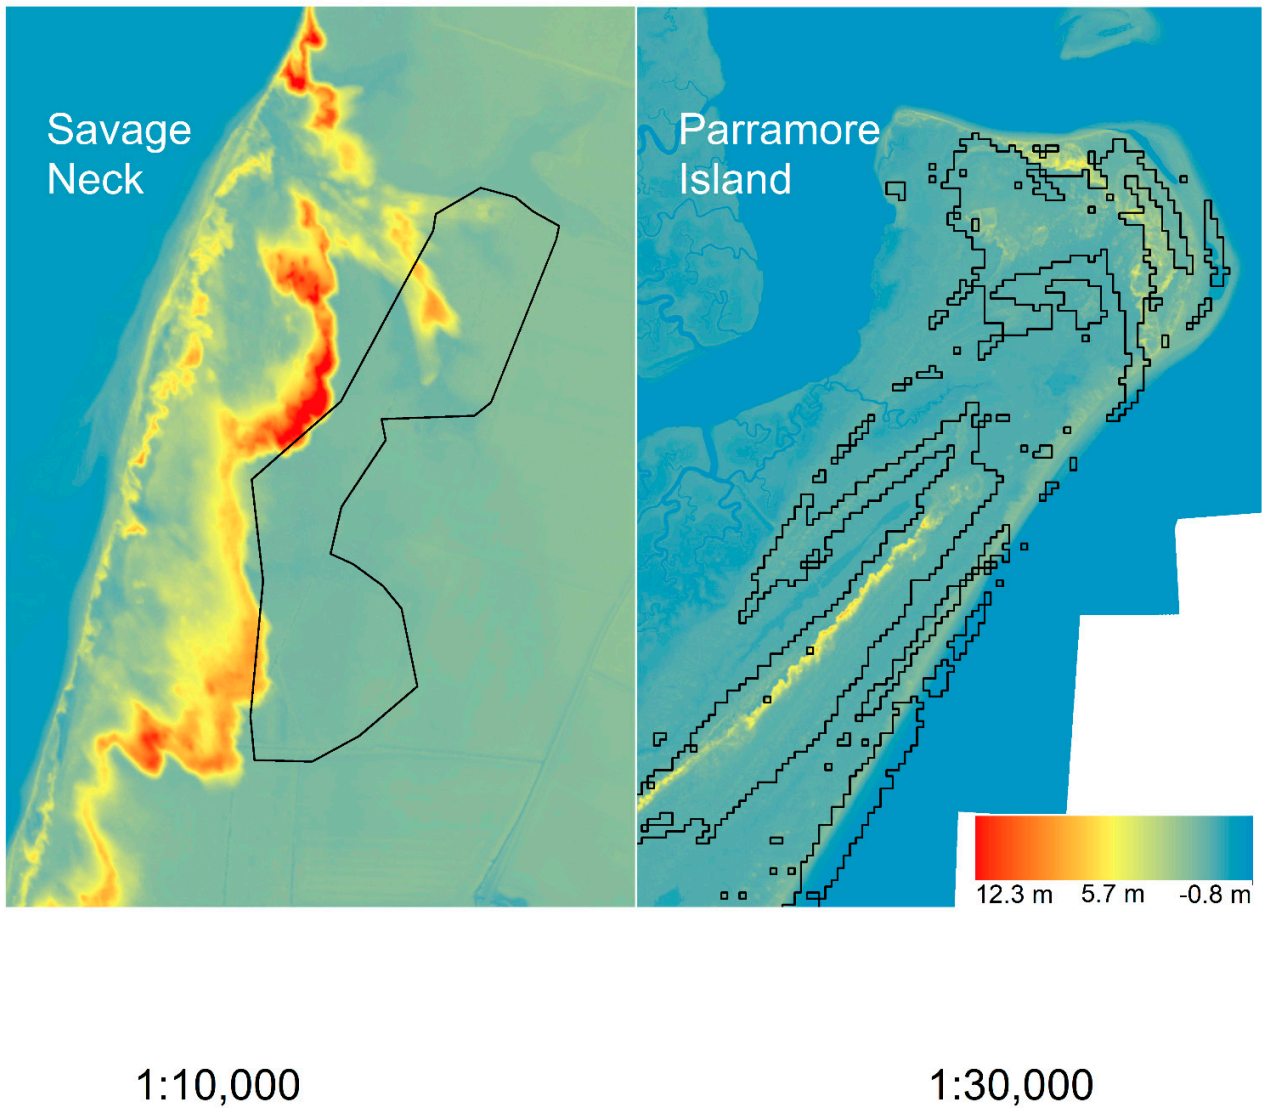

Supplementary Figure 1. Digital elevation model of the two sites from the 2015 Eastern Shore, VA Lidar (<https://coast.noaa.gov>). Note the difference in scale between the two maps. The forested portion of Savage Neck Dunes is shown in black. On Parramore Island, black outline represents the 1998 woody vegetation class shown in Figure 4.
